# Supplementary material for: SUMO-Targeted Ubiquitin Ligases (STUbLs) Reduce the Toxicity and Abnormal Transcriptional Activity Associated With a Mutant, Aggregation-Prone Fragment of Huntingtin
Source: PubMed Central journal article supplement (PMC6154015; doi:10.3389/fgene.2018.00379), 2018-09-18
Supplement: Table_4.pdf [file Table_4.pdf]

|                                                   |                                                                                                                                                                                                                                                                                                                                                                                                                                                                                                                                                                                                                                                                                                                                                                                                                                                                                                                                                                                                                                                                                                                                                                                                                                                                                                                                                                                                                                                                                                                                                                                                                                                                                                                                                                                                                                                                                                                                                                                                                                                                                                                                                                                                                                                                                                                                                                                                                                                                                                                                                                                                                                                                                                                                                                                                                                                                                                                                                                                                                           | Selected Components                                                                                                                                                                                                                                                                                                                                                                                                                                                                                                                                                                                                                                                                                                                                                                                                                                                                                                                                                                                                                                                                                                                                                                                                                                                                                                                                                                                                                                                      |                        |                         |                       |
|---------------------------------------------------|---------------------------------------------------------------------------------------------------------------------------------------------------------------------------------------------------------------------------------------------------------------------------------------------------------------------------------------------------------------------------------------------------------------------------------------------------------------------------------------------------------------------------------------------------------------------------------------------------------------------------------------------------------------------------------------------------------------------------------------------------------------------------------------------------------------------------------------------------------------------------------------------------------------------------------------------------------------------------------------------------------------------------------------------------------------------------------------------------------------------------------------------------------------------------------------------------------------------------------------------------------------------------------------------------------------------------------------------------------------------------------------------------------------------------------------------------------------------------------------------------------------------------------------------------------------------------------------------------------------------------------------------------------------------------------------------------------------------------------------------------------------------------------------------------------------------------------------------------------------------------------------------------------------------------------------------------------------------------------------------------------------------------------------------------------------------------------------------------------------------------------------------------------------------------------------------------------------------------------------------------------------------------------------------------------------------------------------------------------------------------------------------------------------------------------------------------------------------------------------------------------------------------------------------------------------------------------------------------------------------------------------------------------------------------------------------------------------------------------------------------------------------------------------------------------------------------------------------------------------------------------------------------------------------------------------------------------------------------------------------------------------------------|--------------------------------------------------------------------------------------------------------------------------------------------------------------------------------------------------------------------------------------------------------------------------------------------------------------------------------------------------------------------------------------------------------------------------------------------------------------------------------------------------------------------------------------------------------------------------------------------------------------------------------------------------------------------------------------------------------------------------------------------------------------------------------------------------------------------------------------------------------------------------------------------------------------------------------------------------------------------------------------------------------------------------------------------------------------------------------------------------------------------------------------------------------------------------------------------------------------------------------------------------------------------------------------------------------------------------------------------------------------------------------------------------------------------------------------------------------------------------|------------------------|-------------------------|-----------------------|
| Cellular Component                                | Genes                                                                                                                                                                                                                                                                                                                                                                                                                                                                                                                                                                                                                                                                                                                                                                                                                                                                                                                                                                                                                                                                                                                                                                                                                                                                                                                                                                                                                                                                                                                                                                                                                                                                                                                                                                                                                                                                                                                                                                                                                                                                                                                                                                                                                                                                                                                                                                                                                                                                                                                                                                                                                                                                                                                                                                                                                                                                                                                                                                                                                     | Counts                                                                                                                                                                                                                                                                                                                                                                                                                                                                                                                                                                                                                                                                                                                                                                                                                                                                                                                                                                                                                                                                                                                                                                                                                                                                                                                                                                                                                                                                   | Count of Overexpressed | Count of Underexpressed | No Data on expression |
|                                                   | GTR2/YGR163W, GSP2/YOR186C, YNL194C, RSM27/YDR215W, ICT1/YLR099C, ZDS2/YML109W, TSL1/YML100W, LYS20/YDL182W, FMP45/YDL222C, ALG6/YOR002W, NHP2/YDL208W, YDL124W, SHH4/YLR164W, TFS2/YDR074W, COA2/YPL188C-A, GAL1/YBR020W, CAT5/YOR125C, FIS1/YLO65C, PRR2/YDL24C, COS2/YML130W, BEN2/YER155C, WMR1/YHL035C, ARG1/YOLO58W, GRH1/YDR517W, SSA2/YLLO24C, NCA2/YPR155C, YER139W, RPS27A/YKL156W, XKS1/YGR194C, MRPL48/YLO09W, GSI1/YFR015C, MCH1/YOL115C, MET19/YPR167C, PDH1/YPR002W, ISA2/YPR067W, TAH18/YPR048W, OPI1/YHL020C, GAD1/YMR250W, YGL185C, PET181/YJR054W, TMA22/YJR014W, YOS1/YER074W-A, MIX17/YMR020W, RPS42/YMR105C, MIM1/YLLO06W, GPH1/YPR160W, LEU8/YOR108W, ATP17/YDR377W, ATG7/YHR171W, NDE1/YJR024C, EMC8/YLLO14W, ERG2/YMR020W, ERP5/YHR110W, RPL7A/YLO76C, EGS1/YNL090C, YPR11/YDR368W, YJR096W, DCS2/YOR173W, BCH1/YMR237W, CTT1/YGR088W, YDJ1/YNL054C, FMP46/YKR049C, HEM13/YDR044W, CNL1/YDR357C, SYN8/YAL014C, PRM8/YLLO35W, COS5/YR161C, GTS3/YMR251W, ECM4/YDR078W, CDC10/YCR002C, GSY2/YLR288W, COS3/YML132W, SYM1/YLR251W, LBP15/YMR304W, RPB7/YDR044C, SKN1/YGR143W, SAH1/YER043C, JAC1/YLO181C, GLC3/YLLO11W, AGX1/YFL030W, CLB1/YGR169W, AFS3/YPL051W, RPA43/YOR340C, GOR1/YNL274C, LSP1/YPL004C, SOL4/YGR248W, GRE3/YHR04W, PET100/YDR079W, SEC11/YR022W, ADE3/YOR294W, TAZ1/YER055C, ERP3/YDL018C, TIG1/YOR466C, ACO1/YJR105W, SNO2/YNL334C, YPT53/YNL093W, RPL7B/YPL198W, GLK1/YCL040W, GCY1/YOR120W, RFC3/YHR087W, FUN4/YAL008W, TKL2/YR117C, MSW1/YGR089W, UFS2/YL165C, COX8/YLLO49W, STS2/YGL184C, YNL200C, YMR196W, YPR172W, YKL023W, YOR289W, YER134C, YML31W, YNR034W-A, YKR052C, YDR391C, YOR111W, YR0341W, RFP1/YML219W, PPA2/YMR267W, VID3/YGL27W, SEN1/YLR430W, GDB1/YPR184W, TFS1/YLR178C, MET30/YLO46W, SAN1/YDR143C, PCL5/YPL219W, YNK1/YKL067W, MSD1/YPL104W, RNY1/YPL122C, GRX1/YBR014C, ALG3/YGL047W, RFS1/YR090C, ARO2/YHR137W, NTO1/YPR031W, RBG2/YGR173W, MOB2/YL034C-B, NQM1/YGR043C, MET13/YR010W, NTH1/YR001C, ETP1/YHL010C, CRG1/YHR209W, ALD3/YMR166C, HSB1/YGR189W-A, MMS2/YGL067C, TPK1/YL164C, PHR1/YOR386W, IGG1/YPL242C, FKH1/YL131C, HST2/YPL015C, MAP1/YLR244C, YCP4/YCR004C, HSP81/YDR330C, NCE102/YPR149W, SCS22/YL091C-A, GND2/YGR258W, GRX1/YCL055C, NTH2/YBR001C, TAD2/YJL035C, AMD1/YML035C, SDS23/YGL066C, MET6/YER091C, RCK2/YLR248W, GLO2/YDR272W, RKM3/YBR030W, BAT2/YJR148W, ATF2/YGR171C, UGP1/YKL035W, SDR1/YML133W, GPP2/YR062C, DOG2/YHR043C, PIG2/YL045W, PHO4/YFR034C, GPX1/YKL026W, LYS1/YMR034C, UBC1/YR0339C, SLM5/YCR024C, SSP120/YLR250W, ALD3/YR016W, YAK1/YJL141C, TSM4/YOL022C, GRX2/YDR513W, YCH1/YGR203W, TSA2/YDR453C, AIM10/YER087W, DBF2/YGR092W, REF2/YDR189W, RTS3/YGR161C, ECM425/YJL201W, SFG1/YOR315W, ZRG8/YER033C, ATCS3A/YL083W, SLM4/YBR077C, MNE1/YOR350C, RTN2/YDL204W, PAI1/YMR174C, STF2/YGR008C, DOR48/YMR173W, EAF5/YEL018W, MEH1/YKR007W, PEK21/YGR239C, MDR1/YOR100W, CYP5/YPL246C, YMR089W, GAP2/YL034C, YCD24/YR105C, LFO1/YML088W, GP2/YER054C, ADP1/YCR011C, TGL3/YMR313C, AIM20/YL158W, THM4/YR144W | 208                                                                                                                                                                                                                                                                                                                                                                                                                                                                                                                                                                                                                                                                                                                                                                                                                                                                                                                                                                                                                                                                                                                                                                                                                                                                                                                                                                                                                                                                      | 142                    | 52                      | 14                    |
|                                                   | Cytoplasm or Cytosol                                                                                                                                                                                                                                                                                                                                                                                                                                                                                                                                                                                                                                                                                                                                                                                                                                                                                                                                                                                                                                                                                                                                                                                                                                                                                                                                                                                                                                                                                                                                                                                                                                                                                                                                                                                                                                                                                                                                                                                                                                                                                                                                                                                                                                                                                                                                                                                                                                                                                                                                                                                                                                                                                                                                                                                                                                                                                                                                                                                                      | GSP2/YDR186C, MEA4/YGR170W, TSA2/YMR062W, NHP2/YDL208W, KMX1/YKL161C, PRR2/YDL24C, COS2/YML130W, SSA2/YLLO24C, SRB7/YDR308C, OPI1/YHL020C, YGL185C, MCM1/YMR043W, MIX17/YMR020W, PFP1/YHR062C, DBF4/YDR052C, DCS2/YOR173W, SNF5/YR299W, RAD2/YCR686C, ABE1/YBR242C, VID3/YGL27W, PEF7/YDR404C, CLB1/YGR108W, RPA43/YOR340C, GOR1/YNL274C, YAP7/YOL029C, ADO1/YJR165W, RTC3/YHR087W, TKL2/YR117C, BLI022/YMR014W, YMS11C, YCR091C-A, YPR172W, YOR018C, YOR259W, YER134C, YKR075C, YDR391C, YKL091C, RAP1/YNL216W, SRS2/YJL092W, HMX1/YLR205C, VID30/YGL227W, SEN1/YLR430W, MET30/YL046W, SAN1/YDR143C, PCL5/YPL219W, NMA2/YGR010W, ALG13/YGL047W, ARO9/YHR137W, NTO1/YPR031W, MOB2/YL034C-B, NQM1/YGR043C, NAF1/YLR124W, MMS2/YGL087C, TPK1/YL164C, PHR1/YOR386W, HMI1/YL131C, HST2/YPL015C, GRX1/YOL035C, TAD2/YLLO35C, SDS23/YGL066C, RKM3/YBR030W, BAT2/YJR148W, HAP3/YL021C, PSY2/YNL201C, SDR1/YML133W, GPP2/YR062C, DOG2/YHR043C, PHS2/YR034C, CPT2/YML115W, UBC1/YR0339C, YAK1/YL141C, HMI1/YOLO95C, GRX2/YDR513W, YCH1/YGR203W, DBF2/YGR092W, SLK5/YDL013W, KRCS3/YML132W, REF2/YDR195W, PSH1/YCL054W, RTS3/YGR161C, EGS1/YNL090W, AFB1/YNL129W, MLE3/YBR107C, SFG1/YOR193W, snR8, ASI1/YMR119W, LIP1/YMR289W, YPR1586C-D, SPO12/YHR152W, YOR192C-B, UJP4/YPL186C, YER138C, ESC2/YR063W, YAR010C, YPR188W-B, SYO1/YDR176C, YPR158C-C, RTN2/YDL204W, PAI1/YMR174C, EAF5/YEL018W, CBC2/YPL178W, LFO1/YML088W, SPT2/YDL148C, GAL1/YLO15W, RRP9/YPR137W, AIM20/YL158W | 108                    | 58                      | 41                    |
| Nucleus (including all nuclear parts & nucleolus) | RSM27/YGR215W, ICT1/YLR099C, LYS20/YDL182W, SHH4/YLR164W, COA2/YPL188C-A, CAT5/YOR125C, FIS1/YLO65C, NCA2/YPR155C, MRP148/YL006W, PDH1/YPR002W, ISA2/YPR067W, PET191/YJR034W, MIX17/YMR020W, MIM1/YLLO06W, LEU8/YOR108W, ATP17/YDR377W, FMP46/YKR049C, JAC1/YGL018C, PET100/YDR079W, YPT53/YML093W, FUN4/YAL008W, MSW1/YDR286W, UFS2/YL165C, PRM8/YLLO35W, SKN1/YGR143W, AIN4/YOR212C, MIM1/YLLO43C, YPL109C, LYS4/YDR234W, YNL122C, YKL133C, YNL195C, YKR041W, CHA1/YCL04C, MKX10/YDR282C, PPA2/YMR267W, GDB1/YPR184W, NEE2/YLLO05W, MRK2/YKL064W, YNK1/YKL076W, BID2/YGR285C, MSD1/YPL104W, FMP25/YLR077W, MRH1/YDR033W, FMP45/YNL168C, MET3/YR101W, RCF1/YML030W, ADL4/YOR374W, AM17/YHL021C, FRS1/YOR271C, HSB1/YGR189W-B, PHR1/YOR386W, YCP4/YCR004C, YR02/YBR054W, NCE102/YPR149W, NTH2/YBR001C, CEM1/YER061C, BAT2/YJR148W, FMP27/YLR454W, GPX1/YKL026C, SLM5/YCR024C, OSM1/YJR051W, ALD6/YPL061W, HMI1/YOLO95C, GRX2/YDR513W, AIM10/YER087W, MGR1/YCL044C, MRPL50/YNR022C, ZRG8/YER033C, UJP4/YPL186C, INA17/YPL099C, CBT1/YKL208W, MSC1/YML128C, OMA5/YL136W, SPT1/YGR236C, MNE1/YOR035C, STF1/YLLO130W-A, FMP33/YJL161W, FMP16/YDR070C, TAZ1/YPR148W                                                                                                                                                                                                                                                                                                                                                                                                                                                                                                                                                                                                                                                                                                                                                                                                                                                                                                                                                                                                                                                                                                                                                                                                                                                                                                                                                                                                                                                                                                                                                                                                                                                                                                                                                                                                                                                            | 81                                                                                                                                                                                                                                                                                                                                                                                                                                                                                                                                                                                                                                                                                                                                                                                                                                                                                                                                                                                                                                                                                                                                                                                                                                                                                                                                                                                                                                                                       | 67                     | 10                      | 4                     |
| Mitochondria                                      | ALG6/YOR002W, OPI1/YHL020C, YOS1/YER074W-A, MIM1/YLLO06W, EMC8/YLLO14W, ERG2/YMR020W, ERP5/YHR110W, EGS1/YNL090C, PRM8/YLLO35W, SKN1/YGR143W, SEC11/YR022W, ERP3/YDL018C, YPT53/YML093W, YDR018C, YNL068C, HMX1/YLR205C, ALG13/YGL047W, NCR1/YPL060W, YRQ2/YBR054W, NCE102/YPR149W, SCS22/YL091C-A, ESC5/YMR015C, HMI1/YGL077C, TSM4/YR115W, ATF2/YGR171C, ERG11/YHR070C, OSM1/YJR051W, ALG3/YLLO28C, SPM3/YLR034C, LIP1/YMR289W, UJP4/YPL186C, MSC1/YML128C, SPT1/YGR236C, RTN2/YDL204W, YDR088C-A, ADP1/YCR011C, PHM7/YLO084W                                                                                                                                                                                                                                                                                                                                                                                                                                                                                                                                                                                                                                                                                                                                                                                                                                                                                                                                                                                                                                                                                                                                                                                                                                                                                                                                                                                                                                                                                                                                                                                                                                                                                                                                                                                                                                                                                                                                                                                                                                                                                                                                                                                                                                                                                                                                                                                                                                                                                           | 37                                                                                                                                                                                                                                                                                                                                                                                                                                                                                                                                                                                                                                                                                                                                                                                                                                                                                                                                                                                                                                                                                                                                                                                                                                                                                                                                                                                                                                                                       | 27                     | 10                      | 0                     |
| Endoplasmic Reticulum                             | FIS1/YLO65C, AGX1/YFL030W, GPX1/YKL026C, PEX21/YGR239C                                                                                                                                                                                                                                                                                                                                                                                                                                                                                                                                                                                                                                                                                                                                                                                                                                                                                                                                                                                                                                                                                                                                                                                                                                                                                                                                                                                                                                                                                                                                                                                                                                                                                                                                                                                                                                                                                                                                                                                                                                                                                                                                                                                                                                                                                                                                                                                                                                                                                                                                                                                                                                                                                                                                                                                                                                                                                                                                                                    | 4                                                                                                                                                                                                                                                                                                                                                                                                                                                                                                                                                                                                                                                                                                                                                                                                                                                                                                                                                                                                                                                                                                                                                                                                                                                                                                                                                                                                                                                                        | 3                      | 0                       | 1                     |
| Peroxisome                                        | GRH1/YDR517W, YOS1/YER074W-A, ERP5/YHR110W, BCH1/YMR237W, PRM8/YLLO35W, ARL3/YPL051W, ERP3/YDL018C, YPT53/YML093W, GRX1/YBR014C, VTH2/YJL222W, AKR1/YOR264C, CNT1/YOR320C                                                                                                                                                                                                                                                                                                                                                                                                                                                                                                                                                                                                                                                                                                                                                                                                                                                                                                                                                                                                                                                                                                                                                                                                                                                                                                                                                                                                                                                                                                                                                                                                                                                                                                                                                                                                                                                                                                                                                                                                                                                                                                                                                                                                                                                                                                                                                                                                                                                                                                                                                                                                                                                                                                                                                                                                                                                 | 12                                                                                                                                                                                                                                                                                                                                                                                                                                                                                                                                                                                                                                                                                                                                                                                                                                                                                                                                                                                                                                                                                                                                                                                                                                                                                                                                                                                                                                                                       | 11                     | 1                       | 0                     |
| CotG1 Apparatus                                   | ALG6/YOR002W, RPS27A/YKL156W, MRPL49/YL096W, TMA22/YJR014W, RPL7A/YLO76C, RPL7B/YPL198W, YNL122C, RPL43A/YPR043W                                                                                                                                                                                                                                                                                                                                                                                                                                                                                                                                                                                                                                                                                                                                                                                                                                                                                                                                                                                                                                                                                                                                                                                                                                                                                                                                                                                                                                                                                                                                                                                                                                                                                                                                                                                                                                                                                                                                                                                                                                                                                                                                                                                                                                                                                                                                                                                                                                                                                                                                                                                                                                                                                                                                                                                                                                                                                                          | 8                                                                                                                                                                                                                                                                                                                                                                                                                                                                                                                                                                                                                                                                                                                                                                                                                                                                                                                                                                                                                                                                                                                                                                                                                                                                                                                                                                                                                                                                        | 4                      | 3                       | 1                     |
| Ribosome                                          | MKC7/YDR144C, SPI1/YER150W, YPS6/YR039C, CWP1/YKL096W, PIR3/YKL163W, TIR4/YOR009W, PAU24/YBR301W, UTR2/YEL040W, IIR1/YER011W, DIA3/YDL024C                                                                                                                                                                                                                                                                                                                                                                                                                                                                                                                                                                                                                                                                                                                                                                                                                                                                                                                                                                                                                                                                                                                                                                                                                                                                                                                                                                                                                                                                                                                                                                                                                                                                                                                                                                                                                                                                                                                                                                                                                                                                                                                                                                                                                                                                                                                                                                                                                                                                                                                                                                                                                                                                                                                                                                                                                                                                                | 10                                                                                                                                                                                                                                                                                                                                                                                                                                                                                                                                                                                                                                                                                                                                                                                                                                                                                                                                                                                                                                                                                                                                                                                                                                                                                                                                                                                                                                                                       | 5                      | 4                       | 1                     |
| Cell Wall                                         | YMR1/YHL055C, YER139W, MCH4/YOL119C, YPT53/YML093W, YRLO75C, YNL115C, YNL068C, YBR241C, RNY1/YPL123C, APE3/YBR286W, NCR1/YPL060W, GNT1/YOR320C, SPM3/YR034C, PHM6/YDR281C, PAU10/YDR542W, YMR244W                                                                                                                                                                                                                                                                                                                                                                                                                                                                                                                                                                                                                                                                                                                                                                                                                                                                                                                                                                                                                                                                                                                                                                                                                                                                                                                                                                                                                                                                                                                                                                                                                                                                                                                                                                                                                                                                                                                                                                                                                                                                                                                                                                                                                                                                                                                                                                                                                                                                                                                                                                                                                                                                                                                                                                                                                         | 16                                                                                                                                                                                                                                                                                                                                                                                                                                                                                                                                                                                                                                                                                                                                                                                                                                                                                                                                                                                                                                                                                                                                                                                                                                                                                                                                                                                                                                                                       | 11                     | 4                       | 1                     |
| Vacuole                                           | FLO11/YR019W, SLM2/YNL047C, PMS1/YOR161C, PMS1/YGL006W, YNL194C, HXT10/YFL011W, HOL1/YNR055C, FMP45/YDL222C, MKC7/YDR144C, YMR1/YHL055C, SSA2/YLLO24C, YPS6/YR039C, QDR3/YBR043C, STE3/YKL176C, PRM8/YLLO35W, MATE1/YHR066C, STI11/YDR536W, LSP1/YPL004C, ADP1/YCR011C, KIN29/YCR091W, YPT53/YL093W, YBL029C-A, HBT1/YDL223C, CCH1/YGR217W                                                                                                                                                                                                                                                                                                                                                                                                                                                                                                                                                                                                                                                                                                                                                                                                                                                                                                                                                                                                                                                                                                                                                                                                                                                                                                                                                                                                                                                                                                                                                                                                                                                                                                                                                                                                                                                                                                                                                                                                                                                                                                                                                                                                                                                                                                                                                                                                                                                                                                                                                                                                                                                                                | 24                                                                                                                                                                                                                                                                                                                                                                                                                                                                                                                                                                                                                                                                                                                                                                                                                                                                                                                                                                                                                                                                                                                                                                                                                                                                                                                                                                                                                                                                       | 15                     | 7                       | 2                     |
| Plasma Membrane                                   | YJL132W, YBR055C, PPA2/YMR267W, RNY1/YPL123C, MRH1/YDR033W, TIR4/YOR009W, PAU24/YBR301W, UTR2/YEL040W, MET6/YER091C, IIR1/YER011W, FLO11/YR019W, YGP1/YNL160W                                                                                                                                                                                                                                                                                                                                                                                                                                                                                                                                                                                                                                                                                                                                                                                                                                                                                                                                                                                                                                                                                                                                                                                                                                                                                                                                                                                                                                                                                                                                                                                                                                                                                                                                                                                                                                                                                                                                                                                                                                                                                                                                                                                                                                                                                                                                                                                                                                                                                                                                                                                                                                                                                                                                                                                                                                                             | 12                                                                                                                                                                                                                                                                                                                                                                                                                                                                                                                                                                                                                                                                                                                                                                                                                                                                                                                                                                                                                                                                                                                                                                                                                                                                                                                                                                                                                                                                       | 5                      | 5                       | 2                     |
| Extracellular Region                              | YER066C-A, YJL009W, YKL053W, YPL185W, YPL114W, YNL114C, YNL170W, YGR239C, YPR126C, YDL011C, YER196C, YOR121C, YGL196C, YL177W, YNL057W, YLR424W, YL0139W-A, YER066C-A, YLR101C, YNR025C, YOL046C, YDR426C, YDL050C, YDL023C, YKL030W, YOR248W, YLR252W, YPR142C, YER133W-A, YPL182C, YL007C, YMR173W-A                                                                                                                                                                                                                                                                                                                                                                                                                                                                                                                                                                                                                                                                                                                                                                                                                                                                                                                                                                                                                                                                                                                                                                                                                                                                                                                                                                                                                                                                                                                                                                                                                                                                                                                                                                                                                                                                                                                                                                                                                                                                                                                                                                                                                                                                                                                                                                                                                                                                                                                                                                                                                                                                                                                    | 32                                                                                                                                                                                                                                                                                                                                                                                                                                                                                                                                                                                                                                                                                                                                                                                                                                                                                                                                                                                                                                                                                                                                                                                                                                                                                                                                                                                                                                                                       | 10                     | 13                      | 9                     |
| Unknown                                           | YKL068W-A, YR042C, YMR181C, YOL029C, YDR461C-A, YNL193W, YDL177C, YCR022C, EM1/YDR512C, AY11/YLL063C, GLG1/YKR058W, MTC7/YEL033W, UGA2/YDL166C, YPS63/YR261C, RIM3/YMR154C, GPO1/YLCL121C, YGR066C, ERH1/YPL281C, KIN29/YCR091W, YDL057W, YBL081W, YLR279W, YNL033W, YOR097C                                                                                                                                                                                                                                                                                                                                                                                                                                                                                                                                                                                                                                                                                                                                                                                                                                                                                                                                                                                                                                                                                                                                                                                                                                                                                                                                                                                                                                                                                                                                                                                                                                                                                                                                                                                                                                                                                                                                                                                                                                                                                                                                                                                                                                                                                                                                                                                                                                                                                                                                                                                                                                                                                                                                              | 24                                                                                                                                                                                                                                                                                                                                                                                                                                                                                                                                                                                                                                                                                                                                                                                                                                                                                                                                                                                                                                                                                                                                                                                                                                                                                                                                                                                                                                                                       | 15                     | 6                       | 3                     |
| Totals                                            | Note: totals indicate unique genes listed in the table above                                                                                                                                                                                                                                                                                                                                                                                                                                                                                                                                                                                                                                                                                                                                                                                                                                                                                                                                                                                                                                                                                                                                                                                                                                                                                                                                                                                                                                                                                                                                                                                                                                                                                                                                                                                                                                                                                                                                                                                                                                                                                                                                                                                                                                                                                                                                                                                                                                                                                                                                                                                                                                                                                                                                                                                                                                                                                                                                                              | 398                                                                                                                                                                                                                                                                                                                                                                                                                                                                                                                                                                                                                                                                                                                                                                                                                                                                                                                                                                                                                                                                                                                                                                                                                                                                                                                                                                                                                                                                      | 248                    | 115                     | 35                    |

KEY  
 Underexpressed  
 Overexpressed  
 No data on expression  
 Previously associated with Huntington  
 Machowski science 2003  
 Panther  
 Wolfe et al. 2014

Counts

300
